# Supplementary material for: Metformin Treatment Is Associated with a Decreased Risk of Nonproliferative Diabetic Retinopathy in Patients with Type 2 Diabetes Mellitus: A Population-Based Cohort Study
Source: Hindawi journal article supplement (doi:10.1155/2020/9161039), 2020-04-20
Supplement: f1 [file 9161039.f1.zip]

Supplementary Table 1: Dose–Response relation for risk of STDR among DM Patients after propensity score matching

|                                   | DM patients<br>without taking<br>metformin | ≤360 DDDs        | 361–720 DDDs     | 721–1080 DDDs    | 1081–1440<br>DDDs | >1440 DDDs       |
|-----------------------------------|--------------------------------------------|------------------|------------------|------------------|-------------------|------------------|
| N                                 | 5022                                       | 2291             | 1310             | 639              | 357               | 425              |
| STDR, n (%)                       | 68 (1.35)                                  | 16 (0.70)        | 8 (0.61)         | 12 (1.88)        | 2 (0.56)          | 5 (1.18)         |
| STDR onset time(years, mean ± SD) | 5.31 ± 3.10                                | 4.51 ± 2.49      | 5.08 ± 2.31      | 8.08 ± 1.79      | 10.6 ± 1.56       | 8.34 ± 1.05      |
| Crude HR (95% CI)                 | Reference                                  | 0.52 (0.30–0.89) | 0.31 (0.15–0.64) | 0.67 (0.36–1.24) | 0.15 (0.04–0.61)  | 0.25 (0.10–0.62) |
| Adjusted HR* (95% CI)             | Reference                                  | 0.46 (0.26–0.81) | 0.24 (0.11–0.52) | 0.42 (0.21–0.84) | 0.08 (0.02–0.33)  | 0.16 (0.06–0.44) |
| p value                           |                                            | 0.0075           | 0.0004           | 0.0132           | 0.0006            | 0.0004           |

\*adjusted for gender, age, comorbidities, medications, aDCSI scores, DM duration, and other antidiabetic drugs use

STDR, sight-threatening diabetic retinopathy; DDD, defined daily dose; aDCSI scores, adapted Diabetes Complications Severity Index scores;

DM, diabetes mellitus; HR, hazard ratio; SD, standard deviation
