# Supplementary material for: Metformin Treatment Is Associated with a Decreased Risk of Nonproliferative Diabetic Retinopathy in Patients with Type 2 Diabetes Mellitus: A Population-Based Cohort Study
Source: Hindawi journal article supplement (doi:10.1155/2020/9161039), 2020-04-20
Supplement: f1 [file 9161039.f1.zip]

Supplementary Table 2: Risk of NPDR in different DDD levels of metformin and DPP4i groups (metformin + DPP-4i vs. metformin alone)

|                                          | Metformin dose $\leq 360$ DDDs |                       | Metformin dose<br>361–720 DDDs |                       | Metformin dose<br>>720 DDDs |                       |
|------------------------------------------|--------------------------------|-----------------------|--------------------------------|-----------------------|-----------------------------|-----------------------|
|                                          | HR (95% CI)                    | Adjusted HR* (95% CI) | HR (95% CI)                    | Adjusted HR* (95% CI) | HR (95% CI)                 | Adjusted HR* (95% CI) |
| Total                                    |                                |                       |                                |                       |                             |                       |
| DPP4i DDD= 0                             | Reference                      | Reference             | Reference                      | Reference             | Reference                   | Reference             |
| 0 < DPP4i DDD $\leq$ 150                 | 0.52 (0.31–0.86)               | 0.50 (0.30–0.83)      | 0.51 (0.28–0.95)               | 0.47 (0.25–0.88)      | 0.75 (0.45–1.28)            | 0.76 (0.45–1.30)      |
| DPP4i DDD > 150                          | 0.46 (0.23–0.93)               | 0.48 (0.24–0.97)      | 0.30 (0.15–0.62)               | 0.29 (0.14–0.59)      | 0.51 (0.30–0.86)            | 0.46 (0.27–0.79)      |
| Time to metformin use after DM diagnosis |                                |                       |                                |                       |                             |                       |
| <3 months                                |                                |                       |                                |                       |                             |                       |
| DPP-4i DDD= 0                            | Reference                      | Reference             | Reference                      | Reference             | Reference                   | Reference             |
| 0 < DPP-4i DDD $\leq$ 150                | 0.39 (0.19–0.79)               | 0.39 (0.19–0.80)      | 0.42 (0.17–1.03)               | 0.40 (0.16–1.00)      | 0.73 (0.39–1.39)            | 0.74 (0.39–1.42)      |
| DPP-4i DDD > 150                         | 0.35 (0.13–0.93)               | 0.35 (0.13–0.95)      | 0.36 (0.14–0.87)               | 0.33 (0.13–0.80)      | 0.38 (0.19–0.76)            | 0.36 (0.18–0.72)      |
| 3 months to 1.5 years                    |                                |                       |                                |                       |                             |                       |
| DPP-4i DDD= 0                            | Reference                      | Reference             | Reference                      | Reference             | Reference                   | Reference             |
| 0 < DPP-4i DDD $\leq$ 150                | 0.53 (0.19–1.48)               | 0.50 (0.17–1.46)      | 0.33 (0.08–1.39)               | 0.32 (0.07–1.43)      | 0.93 (0.32–2.66)            | 0.84 (0.28–2.53)      |
| DPP-4i DDD > 150                         | 0.36 (0.05–2.63)               | 0.35 (0.05–2.54)      | 0.22 (0.03–1.65)               | 0.22 (0.03–1.65)      | 0.46 (0.14–1.53)            | 0.46 (0.14–1.54)      |
| >1.5years                                |                                |                       |                                |                       |                             |                       |
| DPP-4i DDD= 0                            | Reference                      | Reference             | Reference                      | Reference             | Reference                   | Reference             |
| 0 < DPP-4i DDD $\leq$ 150                | 1.45 (0.50–4.16)               | 1.72 (0.57–5.19)      | 1.09 (0.38–3.12)               | 0.80 (0.26–2.45)      | 0.50 (0.06–4.02)            | 0.53 (0.06–4.62)      |
| DPP-4i DDD > 150                         | 1.29 (0.39–4.26)               | 1.02 (0.29–3.57)      | 0.30 (0.07–1.28)               | 0.24 (0.06–1.05)      | 1.82 (0.55–6.04)            | 2.03 (0.58–7.04)      |

\*adjusted for gender, age, comorbidities, medications, aDCSI scores, and other antidiabetic drugs use

NPDR, nonproliferative diabetic retinopathy; DDD, defined daily dose; aDCSI scores, adapted Diabetes Complications Severity Index scores;

HR, hazard ratio;
