# Supplementary material for: Metformin Treatment Is Associated with a Decreased Risk of Nonproliferative Diabetic Retinopathy in Patients with Type 2 Diabetes Mellitus: A Population-Based Cohort Study
Source: J Diabetes Res. 2020 Apr 19;2020:9161039. doi: 10.1155/2020/9161039 (PMC7189314; doi:10.1155/2020/9161039)
Supplement: Supplementary Materials — Supplementary Table 1: dose-response relation for risk of STDR among DM Patients after propensity score matching. Supplementary Table 2: risk of NPDR in different DDD levels of metformin and DDD4i groups (metformin+DPP-4i vs. metformin alone). [file 9161039.f1.zip]

Archive with 2 entries (2 files):
- Supplementary_Table_1_0406.pdf
- Supplementary_Table_2_0406.pdf
